# Supplementary material
Source: MDPI journal article supplement (https://www.mdpi.com/1999-4907/14/7/1475)
Supplement: s1 [file s1]

Table S1. Mantel test of environmental factors against the relative importance of homogeneous selection and homogenizing dispersal in shaping soil bacterial and fungal community. HoS: homogeneous selection; HD: homogenizing dispersal. SWC: soil water content; ST: soil temperature; TC: total carbon; TN: total nitrogen; TP: total phosphorus; TK: total potassium; AP: available phosphorus; SLO: slope. The significant level is \*  $p < 0.05$ , \*\*  $p < 0.01$ .

| Environmental factors | Bacterial community |                 | Fungal community |                |
|-----------------------|---------------------|-----------------|------------------|----------------|
|                       | HoS                 | HD              | HoS              | HD             |
| pH                    | 0.200               | 0.015           | 0.141            | 0.249          |
| SWC                   | 0.153               | 0.421           | -0.353           | -0.070         |
| ST                    | <b>0.400 *</b>      | <b>0.602 **</b> | -0.055           | 0.228          |
| TC                    | -0.032              | 0.008           | <b>0.390 *</b>   | 0.082          |
| TN                    | 0.227               | -0.120          | -0.131           | 0.078          |
| TP                    | 0.338               | <b>0.642 **</b> | 0.066            | <b>0.535 *</b> |
| TK                    | 0.081               | <b>0.581 **</b> | 0.056            | 0.131          |
| AP                    | <b>0.382 *</b>      | <b>0.497 *</b>  | <b>0.471 *</b>   | <b>0.499 *</b> |
| SLO                   | -0.392              | -0.063          | -0.127           | -0.359         |

Table S2. The relative abundance of each bin and contribution for all assembly processes in soil bacterial (a) and fungal (b) community. HeS: heterogeneous selection; HoS: homogeneous selection; DL: dispersal limitation; HD: homogenizing dispersal; DR: drift; RA: relative abundance.

| (a)   |           |           |           |           |           |       |
|-------|-----------|-----------|-----------|-----------|-----------|-------|
|       | HeS       | HoS       | DL        | HD        | DR        | RA    |
| bin1  | Not Found | 0.008     | Not Found | 0.005     | 0.001     | 1.84% |
| bin2  | Not Found | 0.002     | 0.009     | 0.003     | 0.009     | 0.88% |
| bin3  | Not Found | 0.018     | 0.007     | 0.002     | 0.005     | 0.98% |
| bin4  | Not Found | 0.030     | Not Found | 0.001     | 0.001     | 1.16% |
| bin5  | Not Found | 0.002     | Not Found | 0.003     | 0.003     | 1.83% |
| bin6  | Not Found | 0.011     | Not Found | 0.004     | Not Found | 1.96% |
| bin7  | Not Found | 0.019     | Not Found | 0.001     | 0.001     | 3.43% |
| bin8  | Not Found | 0.001     | 0.001     | 0.001     | 0.003     | 1.21% |
| bin9  | Not Found | 0.245     | Not Found | 0.016     | 0.050     | 3.12% |
| bin10 | Not Found | 0.293     | Not Found | 0.107     | 0.021     | 1.06% |
| bin11 | Not Found | Not Found | Not Found | 0.053     | 0.008     | 1.31% |
| bin12 | Not Found | 0.457     | Not Found | 0.350     | Not Found | 1.44% |
| bin13 | Not Found | 0.303     | Not Found | Not Found | Not Found | 1.84% |
| bin14 | Not Found | 0.207     | Not Found | 0.106     | Not Found | 1.35% |
| bin15 | Not Found | 0.015     | Not Found | 0.015     | 0.003     | 3.54% |
| bin16 | Not Found | 0.063     | Not Found | Not Found | Not Found | 1.76% |
| bin17 | Not Found | 0.023     | Not Found | 0.007     | Not Found | 1.24% |
| bin18 | 0.007     | 0.051     | Not Found | Not Found | Not Found | 1.96% |
| bin19 | Not Found | 0.082     | Not Found | Not Found | Not Found | 1.09% |
| bin20 | Not Found | 0.008     | 0.001     | 0.002     | 0.001     | 1.14% |
| bin21 | Not Found | Not Found | Not Found | 0.008     | 0.013     | 2.68% |
| bin22 | Not Found | 0.022     | Not Found | Not Found | Not Found | 1.06% |
| bin23 | Not Found | 0.003     | Not Found | 0.003     | 0.004     | 0.82% |
| bin24 | Not Found | 0.295     | Not Found | Not Found | Not Found | 2.94% |
| bin25 | Not Found | Not Found | Not Found | 0.192     | Not Found | 1.40% |
| bin26 | Not Found | 0.247     | Not Found | 0.151     | 0.024     | 1.80% |
| bin27 | Not Found | 0.035     | Not Found | Not Found | Not Found | 2.53% |
| bin28 | Not Found | Not Found | Not Found | 0.121     | 0.013     | 1.45% |
| bin29 | Not Found | 0.013     | Not Found | 0.021     | 0.002     | 2.48% |
| bin30 | Not Found | 0.104     | Not Found | Not Found | Not Found | 2.24% |
| bin31 | Not Found | 0.004     | Not Found | 0.033     | 0.002     | 2.22% |
| bin32 | Not Found | 0.003     | Not Found | 0.018     | 0.013     | 2.56% |
| bin33 | Not Found | 0.018     | Not Found | 0.028     | 0.018     | 1.49% |
| bin34 | Not Found | 0.104     | Not Found | 0.015     | Not Found | 2.14% |
| bin35 | Not Found | 0.012     | 0.008     | Not Found | 0.001     | 1.88% |
| bin36 | Not Found | 0.001     | Not Found | 0.001     | 0.005     | 0.83% |
| bin37 | Not Found | Not Found | Not Found | Not Found | 0.001     | 0.83% |
| bin38 | 0.002     | 0.012     | Not Found | 0.002     | Not Found | 1.76% |
| bin39 | Not Found | 0.034     | Not Found | 0.060     | Not Found | 2.46% |
| bin40 | Not Found | 0.020     | Not Found | 0.018     | 0.012     | 2.14% |
| bin41 | Not Found | 0.010     | Not Found | 0.068     | 0.020     | 5.24% |
| bin42 | Not Found | 0.162     | Not Found | Not Found | Not Found | 1.21% |
| bin43 | Not Found | 0.256     | Not Found | 0.152     | 0.050     | 1.35% |
| bin44 | Not Found | Not Found | Not Found | 0.114     | 0.037     | 1.67% |
| bin45 | Not Found | Not Found | Not Found | 0.128     | 0.034     | 2.11% |

|       |           |           |           |           |           |       |
|-------|-----------|-----------|-----------|-----------|-----------|-------|
| bin46 | Not Found | 0.120     | Not Found | Not Found | Not Found | 3.33% |
| bin47 | Not Found | Not Found | Not Found | 0.016     | 0.022     | 1.83% |
| bin48 | Not Found | 0.769     | Not Found | Not Found | Not Found | 1.86% |
| bin49 | Not Found | 0.156     | Not Found | Not Found | Not Found | 1.60% |
| bin50 | Not Found | 0.105     | Not Found | Not Found | Not Found | 2.55% |
| bin51 | Not Found | 0.071     | Not Found | 0.255     | Not Found | 3.56% |
| bin52 | Not Found | 0.013     | Not Found | 0.083     | Not Found | 1.84% |

| (b)   |           |           |           |       |           |       |
|-------|-----------|-----------|-----------|-------|-----------|-------|
|       | HeS       | HoS       | DL        | HD    | DR        | RA    |
| bin1  | Not Found | Not Found | Not Found | 0.028 | 0.053     | 2.61% |
| bin2  | 0.024     | Not Found | Not Found | 0.104 | 0.010     | 5.14% |
| bin3  | Not Found | 0.188     | Not Found | 0.004 | Not Found | 1.41% |
| bin4  | Not Found | 0.057     | Not Found | 0.064 | Not Found | 3.73% |
| bin5  | Not Found | Not Found | Not Found | 0.015 | 0.011     | 1.33% |
| bin6  | Not Found | 0.128     | Not Found | 0.098 | Not Found | 3.31% |
| bin7  | Not Found | 0.023     | 0.010     | 0.013 | 0.004     | 3.00% |
| bin8  | Not Found | 0.006     | Not Found | 0.010 | 0.007     | 1.80% |
| bin9  | Not Found | 0.106     | Not Found | 0.054 | Not Found | 3.23% |
| bin10 | Not Found | 0.365     | Not Found | 0.019 | Not Found | 1.62% |
| bin11 | Not Found | 0.109     | Not Found | 0.314 | Not Found | 4.90% |
| bin12 | Not Found | 0.098     | Not Found | 0.001 | Not Found | 2.58% |
| bin13 | Not Found | 0.115     | Not Found | 0.020 | 0.008     | 1.62% |
| bin14 | Not Found | Not Found | Not Found | 0.016 | 0.021     | 3.00% |
| bin15 | Not Found | 0.026     | 0.150     | 0.017 | 0.112     | 2.53% |
| bin16 | 0.003     | Not Found | Not Found | 0.001 | 0.023     | 1.82% |
| bin17 | 0.003     | 0.002     | Not Found | 0.003 | 0.005     | 1.49% |
| bin18 | 0.012     | 0.106     | Not Found | 0.022 | 0.027     | 1.43% |
| bin19 | Not Found | Not Found | 0.009     | 0.005 | 0.011     | 2.42% |
| bin20 | Not Found | Not Found | Not Found | 0.015 | 0.012     | 2.03% |
| bin21 | Not Found | 0.002     | Not Found | 0.004 | 0.003     | 1.54% |
| bin22 | Not Found | 0.005     | Not Found | 0.008 | 0.003     | 2.71% |
| bin23 | Not Found | Not Found | Not Found | 0.013 | 0.004     | 2.14% |
| bin24 | Not Found | 0.047     | Not Found | 0.021 | 0.051     | 1.88% |
| bin25 | Not Found | 0.004     | Not Found | 0.012 | 0.006     | 1.25% |
| bin26 | Not Found | Not Found | Not Found | 0.008 | 0.008     | 1.43% |
| bin27 | Not Found | 0.136     | Not Found | 0.010 | Not Found | 1.82% |
| bin28 | Not Found | 0.009     | Not Found | 0.006 | 0.001     | 1.56% |
| bin29 | Not Found | 0.021     | Not Found | 0.069 | 0.059     | 1.62% |
| bin30 | Not Found | 0.499     | Not Found | 0.024 | Not Found | 3.10% |
| bin31 | Not Found | 0.004     | Not Found | 0.017 | 0.015     | 1.72% |
| bin32 | Not Found | 0.316     | Not Found | 0.040 | Not Found | 1.96% |
| bin33 | Not Found | 0.332     | Not Found | 0.029 | 0.005     | 2.27% |
| bin34 | Not Found | Not Found | Not Found | 0.032 | 0.009     | 2.01% |
| bin35 | Not Found | 0.034     | Not Found | 0.082 | 0.079     | 1.69% |
| bin36 | Not Found | 0.001     | Not Found | 0.021 | 0.030     | 1.69% |
| bin37 | Not Found | 0.780     | Not Found | 0.141 | 0.164     | 2.50% |
| bin38 | 0.013     | 0.055     | Not Found | 0.045 | 0.008     | 4.51% |
| bin39 | Not Found | 0.425     | Not Found | 0.104 | Not Found | 3.44% |
| bin40 | Not Found | 0.240     | Not Found | 0.140 | Not Found | 3.02% |

|       |           |       |           |       |           |       |
|-------|-----------|-------|-----------|-------|-----------|-------|
| bin41 | Not Found | 0.066 | Not Found | 0.050 | Not Found | 3.26% |
| bin42 | Not Found | 0.014 | Not Found | 0.004 | 0.003     | 1.88% |

---

Table S3. The number and relative abundance of dominant bacterial (a) and fungal (b) taxa among phylum.

| (a)                          |               |               |             |
|------------------------------|---------------|---------------|-------------|
| The dominant bacterial group | Abundant taxa | Moderate taxa | Rare taxa   |
| Group 1B                     |               |               |             |
| Acidobacteria                | 2 (0.125)     | 67 (0.154)    | 132 (0.023) |
| Verrucomicrobia              | 1 (0.063)     | 19 (0.044)    | 138 (0.024) |
| Proteobacteria               | 6 (0.375)     | 60 (0.138)    | 114 (0.020) |
| Total                        | 9 (0.563)     | 146 (0.336)   | 384 (0.068) |
| Group 2B                     |               |               |             |
| Proteobacteria               | Not Found     | 23 (0.053)    | 194 (0.034) |
| Actinobacteria               | 1 (0.063)     | 25 (0.058)    | 203 (0.036) |
| Firmicutes                   | Not Found     | 4 (0.009)     | 35 (0.006)  |
| Acidobacteria                | Not Found     | 17 (0.039)    | 69 (0.012)  |
| Total                        | 1 (0.063)     | 69 (0.159)    | 501 (0.088) |
| (b)                          |               |               |             |
| The dominant bacterial group | Abundant taxa | Moderate taxa | Rare taxa   |
| Group 1F                     |               |               |             |
| Basidiomycota                | 6 (0.188)     | 6 (0.462)     | 195 (0.053) |
| Ascomycota                   | 1 (0.031)     | Not Found     | 159 (0.043) |
| Zygomycota                   | 7 (0.219)     | 1 (0.077)     | 84 (0.023)  |
| Total                        | 14 (0.438)    | 7 (0.539)     | 438 (0.118) |
| Group 2F                     |               |               |             |
| Basidiomycota                | 1 (0.031)     | 1 (0.077)     | 60 (0.016)  |
| Ascomycota                   | 4 (0.125)     | 3 (0.231)     | 562 (0.151) |
| Total                        | 5 (0.156)     | 4 (0.308)     | 622 (0.168) |

Table S4. The richness of bacterial and fungal taxa in all elevation sample plots. AT: abundant taxa; RT: rare taxa; Overall: all taxa. DY9B1 indicates bacterial community at the elevation of 900 m in Daiyun mountain, and so on.

| Sample plots | Richness |         |       | Sample plots | Richness |         |       |
|--------------|----------|---------|-------|--------------|----------|---------|-------|
|              | AT       | Overall | RT    |              | AT       | Overall | RT    |
| DY9B1        | 10116    | 69294   | 21553 | DY9F1        | 28841    | 66780   | 22409 |
| DY9B2        | 8969     | 67731   | 21796 | DY9F2        | 30143    | 68114   | 21953 |
| DY9B3        | 8955     | 67484   | 21581 | DY9F3        | 29191    | 65599   | 20466 |
| DY10B1       | 10017    | 69321   | 20080 | DY10F1       | 35359    | 70522   | 21264 |
| DY10B2       | 9536     | 70184   | 20686 | DY10F2       | 30459    | 69637   | 23924 |
| DY10B3       | 9722     | 69041   | 20344 | DY10F3       | 46371    | 86973   | 25048 |
| DY11B1       | 7924     | 67286   | 23591 | DY11F1       | 33465    | 70801   | 9598  |
| DY11B2       | 8136     | 68919   | 22548 | DY11F2       | 35382    | 70725   | 9785  |
| DY11B3       | 8251     | 69111   | 22576 | DY11F3       | 33040    | 70406   | 9979  |
| DY12B1       | 8520     | 69205   | 21350 | DY12F1       | 17246    | 67223   | 26002 |
| DY12B2       | 7909     | 66335   | 20278 | DY12F2       | 17066    | 67993   | 25825 |
| DY12B3       | 8473     | 69042   | 21086 | DY12F3       | 16230    | 66578   | 25247 |
| DY13B1       | 11184    | 69285   | 23264 | DY13F1       | 30167    | 66266   | 27034 |
| DY13B2       | 10304    | 68107   | 22832 | DY13F2       | 28446    | 65619   | 28011 |
| DY13B3       | 10593    | 70832   | 24084 | DY13F3       | 31580    | 67903   | 27581 |
| DY14B1       | 10606    | 68420   | 22778 | DY14F1       | 39334    | 67691   | 14620 |
| DY14B2       | 9947     | 70880   | 24341 | DY14F2       | 39311    | 67270   | 14556 |
| DY14B3       | 9706     | 68411   | 23623 | DY14F3       | 37072    | 66497   | 15851 |
| DY15B1       | 10265    | 69431   | 22893 | DY15F1       | 26306    | 65344   | 22553 |
| DY15B2       | 10068    | 70671   | 23445 | DY15F2       | 27377    | 66537   | 22750 |
| DY15B3       | 10201    | 70951   | 23643 | DY15F3       | 29663    | 68889   | 21695 |

**Figure captions for supplementary**

**Figure S1.** The abundance of OTUs in the bacterial (a) and fungal (b) community. AAT: absolutely abundant taxa; ART: absolutely rare taxa; CAT: conditionally abundant taxa; CRAT: conditionally rare or abundant taxa; CRT: conditionally rare taxa; MT: moderate taxa.

**Figure S2.** The heatmap of the dominant bacterial (a) and fungal (b) community along the elevational gradient. DY9B indicates bacterial community at the elevation of 900 m in Daiyun mountain, and so on.

**Figure S3.** The relative importance of homogeneous selection and homogenizing dispersal on microbial community in different elevations.

**Figure S4.** The abundance of bacterial (a) and fungal (b) bins.

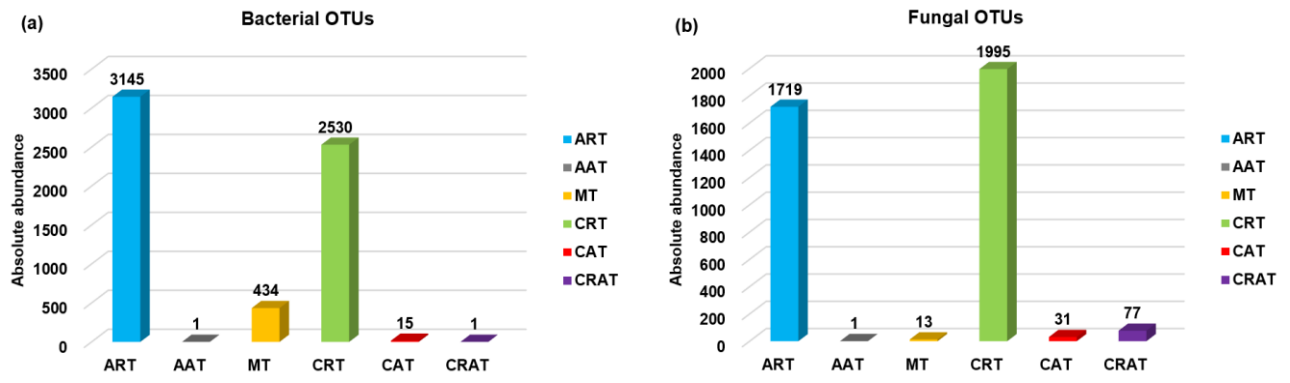

**Figure S1.** The abundance of OTUs in the bacterial (a) and fungal (b) community. AAT: absolutely abundant taxa; ART: absolutely rare taxa; CAT: conditionally abundant taxa; CRAT: conditionally rare or abundant taxa; CRT: conditionally rare taxa; MT: moderate taxa.



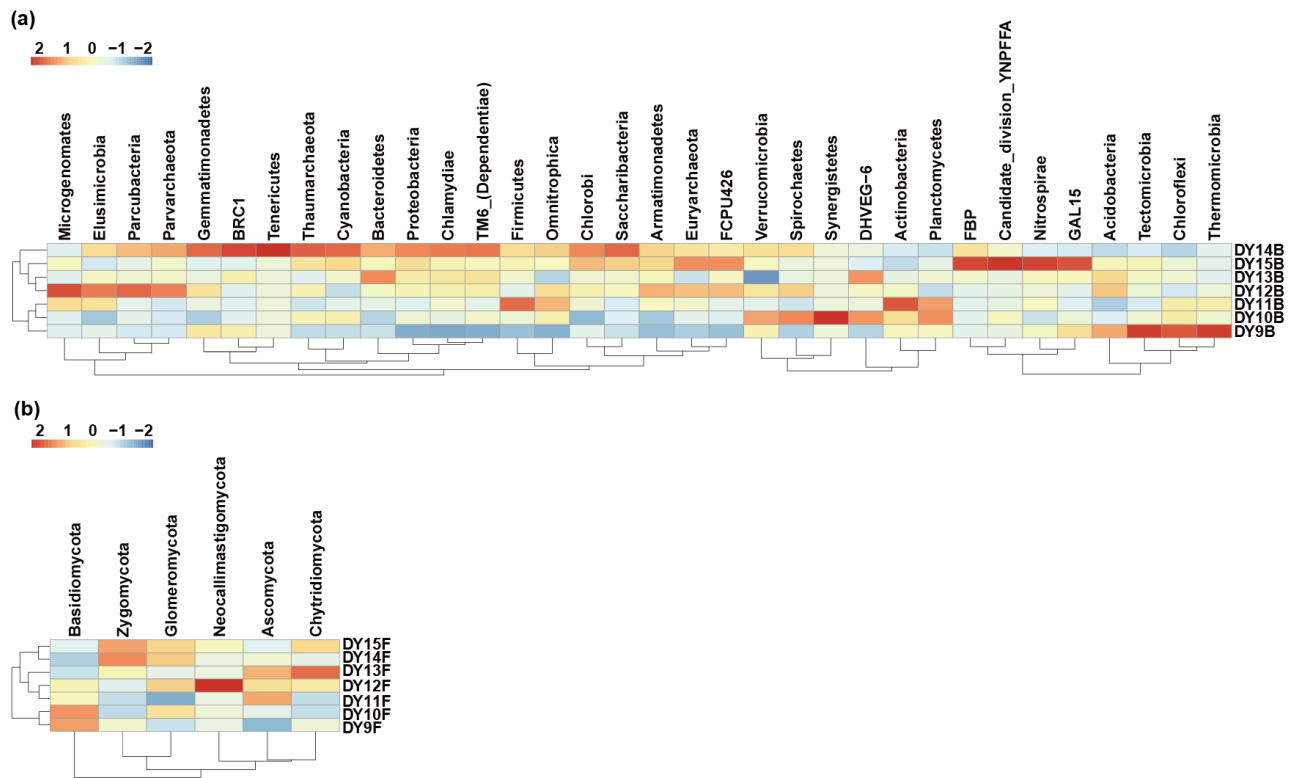

**Figure S2.** The heatmap of the dominant bacterial (a) and fungal (b) community along the elevational gradient. DY9B indicates bacterial community at the elevation of 900 m in Daiyun mountain, and so on.

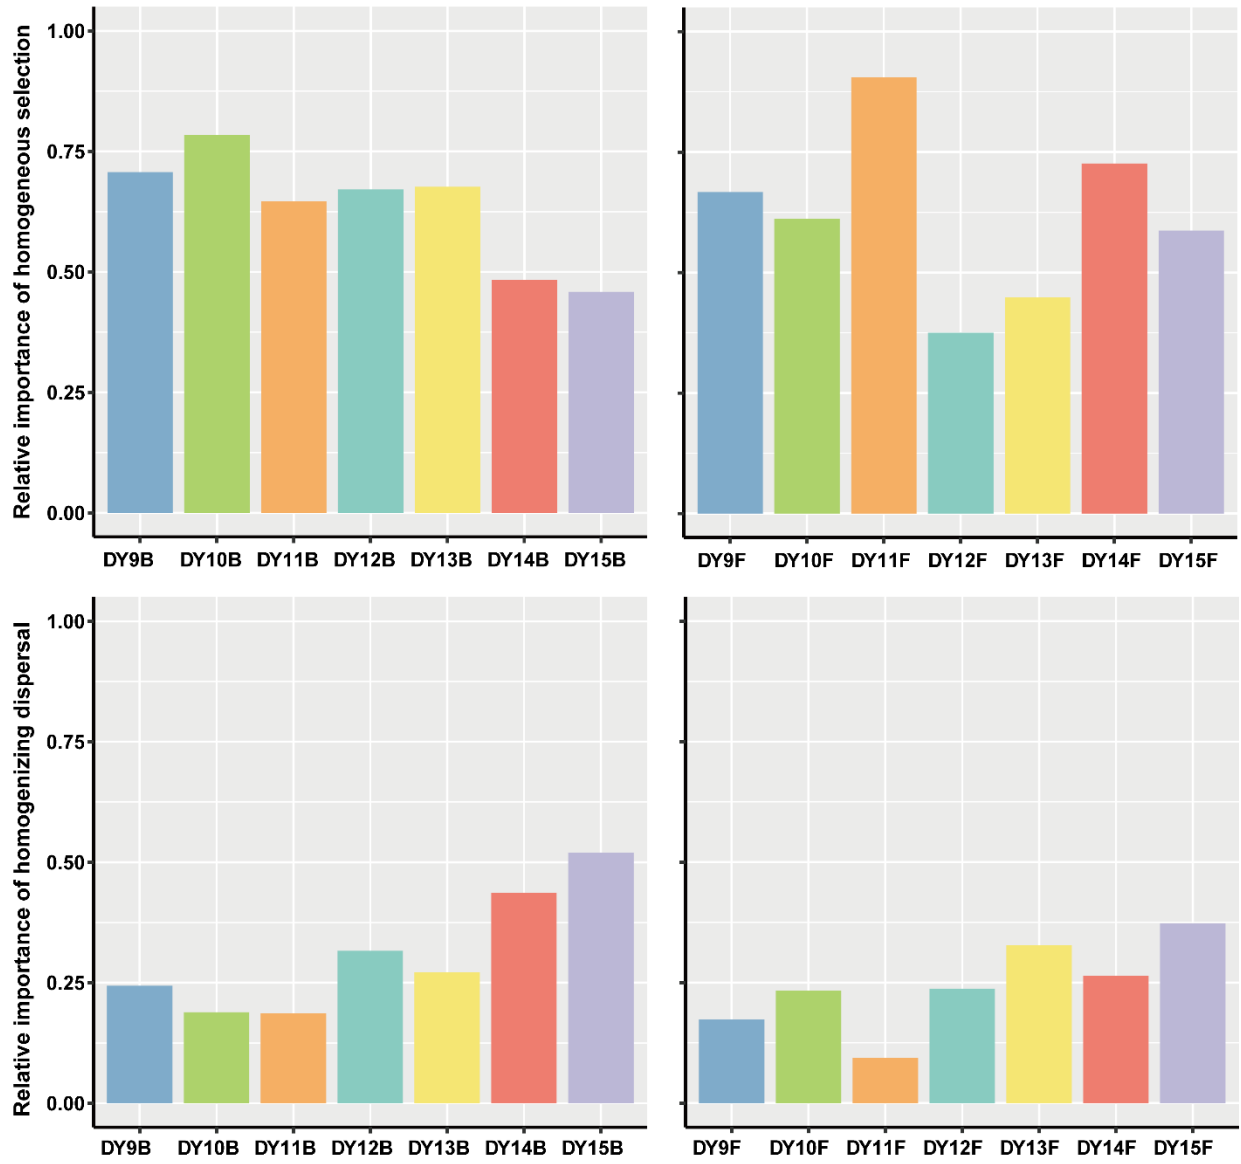

**Figure S3.** The relative importance of homogeneous selection and homogenizing dispersal on microbial community in different elevations.

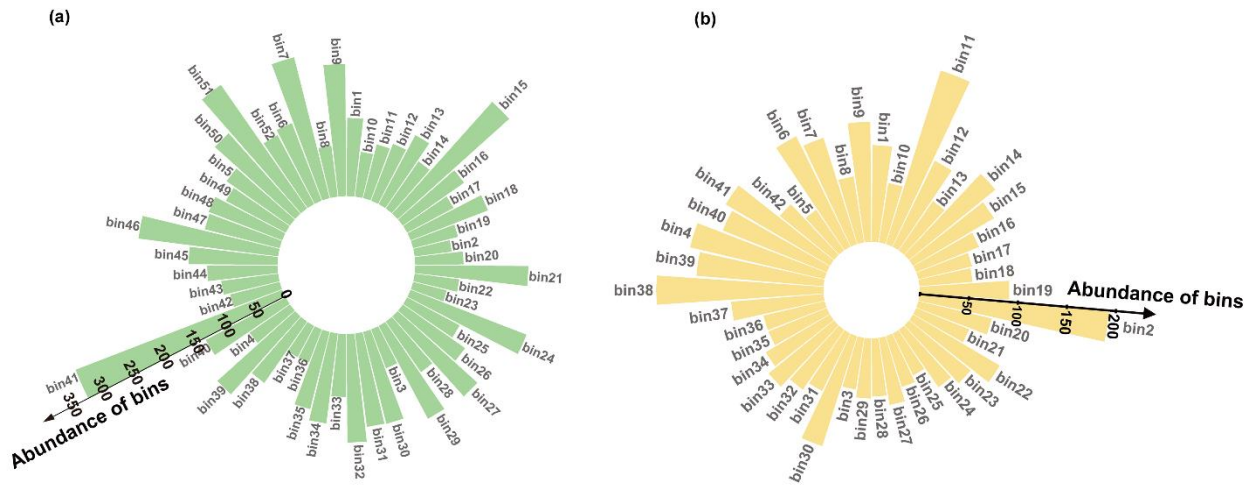

Figure S4. The abundance of bacterial (a) and fungal (b) bins.
